# Supplementary material for: High Rates of Detection and Molecular Characterization of Porcine Adenovirus Serotype 5 (Porcine mastadenovirus C) from Diarrheic Pigs
Source: MDPI journal article supplement (doi:10.3390/pathogens11101210), 2022-10-20
Supplement: s1 [file s1]

**Supplementary table S2.** Primers used in PCR assays to obtain the full-length putative DNA-dependent DNA polymerase (pol) and hexon coding sequences of porcine adenovirus serotype 5 (PAdV-5, species *Porcine mastadenovirus C*) strains from the Dominican Republic. Additional primers (designed from the obtained nucleotide (nt) sequences) used in the sequencing reactions are not shown. Primers employed in the PAdV-5-specific semi-nested PCR screening assay are highlighted with green.

| Primer name        | Primer sequence <sup>1</sup> (5'-3') | Primer position <sup>2</sup> |
|--------------------|--------------------------------------|------------------------------|
| Pol-PCR-1-F        | GTGGTCAAAAGAGGTAAACATTGG             | nt 4205-nt 4229              |
| Pol-PCR-1-R        | CCTTCATAGAGACAGACAATTCAGC            | nt 5243-nt 5218              |
| Pol-Semi-Nested-R  | CTTAGGGCCAAGGGACACGC                 | nt 4617-nt 4598              |
| Pol-PCR-2-F        | CAGACACACGTCATCGTCTTCC               | nt 5047-nt 5068              |
| Pol-PCR-2-R        | AGGAATCATACCAGTCGTTCATCG             | nt 6098-nt 6075              |
| Pol-PCR-3-F        | CAGATGTCATACAGTAGATGGGC              | nt 5825-nt 5848              |
| Pol-PCR-3-R        | TAGCCCAGGATCTGAACTGGTG               | nt 6920-nt 6899              |
| Pol-PCR-4-F        | TTGGACTGGTGACAAATCACCTG              | nt 6578-nt 6600              |
| Pol-PCR-4-R        | CACGCTGAATTATCTCCACCAC               | nt 8040-nt 8019              |
| Pol-Nested-PCR-4-F | CGGCCAGAACAAATCTCATCAAAG             | nt 6603-nt 6625              |
| Pol-Nested-PCR-4-R | GAGATATGTCATGCTTAACCTGG              | nt 7992-nt 7970              |
| Pol-PCR-5-F        | AGCCGCTGTTTACAACACCC                 | nt 11730-nt 11749            |
| Pol-PCR-5-R        | ACTCTCGTAAGAGGGAGGAGG                | nt 12258-nt 12238            |
|                    |                                      |                              |
| Hexon-PCR-1-F      | GGATGGCAGGGAACCCCTGAATAG             | nt 16324-nt 16346            |
| Hexon-PCR-1-R      | TTCTGTCCTGCAAGTCAACAACG              | nt 17423-nt 17401            |
| Hexon-PCR-2-F      | GCTCCTGACACACATCTTGTGTAC             | nt 17213-nt 17236            |
| Hexon-PCR-2-R      | TCAACATGGCCTCCAGAGTAGAAG             | nt 18221-nt 18198            |
| Hexon-PCR-3-F      | GGCAGATACTGCCAGTTTCACATC             | nt 17975-nt 17998            |
| Hexon-PCR-3-R      | TAGGAAACCTGGAAACCGGTTGTC             | nt 19278-nt 19255            |

<sup>1</sup> The primers were designed from the complete genome sequence of PAdV-5 strain HNF-70 (GenBank accession number AF289262).

<sup>2</sup> Nucleotide positions are those of PAdV-5 reference strain HNF-70 (GenBank accession number AF289262).
