# Supplementary material for: High Rates of Detection and Molecular Characterization of Porcine Adenovirus Serotype 5 (Porcine mastadenovirus C) from Diarrheic Pigs
Source: MDPI journal article supplement (doi:10.3390/pathogens11101210), 2022-10-20
Supplement: s1 [file s1]

**Supplementary figure S4.** Multiple alignment of the putative hexon proteins of porcine adenovirus (PAdV) strains GES7 and Z11 with that of PAdV serotype 5 (PAdV-5) (species *Porcine mastadenovirus C*) reference strain HNF-70. Amino acid (aa) mismatches are highlighted with green. The virus serotype (isolate)/GenBank accession number are shown for PAdV-5 isolate HNF-70, whilst the virus name/host/country/year have been mentioned for strains GES7 and Z11. A '\*' denotes an identical aa residue. Numbers to the right indicate the positions of the aa for respective PAdV strains.

|                          |                                                               |     |
|--------------------------|---------------------------------------------------------------|-----|
| PAdV-5_(HNF-70)/AF289262 | MATPSMMPQWSYMHIAQQDASEYLSPLGVQFAQATETYFKLGNKFRNPTVAPTHDVTTER  | 60  |
| GES7/Pig/DOM/2020        | MATPSMMPQWSYMHIAQQDASEYLSPLGVQFAQATETYFKLGNKFRNPTVAPTHDVTTER  | 60  |
| Z11/Pig/DOM/2021         | MATPSMMPQWSYMHIAQQDASEYLSPLGVQFAQATETYFKLGNKFRNPTVAPTHDVTTER  | 60  |
| *****                    |                                                               |     |
| PAdV-5_(HNF-70)/AF289262 | SQRLQLRFVPVDREDTQYTYKTRFQLAVGDNRVLDMASTYFDIRGVIDRGPSFKPYSGTA  | 120 |
| GES7/Pig/DOM/2020        | SQRLQLRFVPVDREDTQYTYKTRFQLAVGDNRVLDMASTYFDIRGVIDRGPSFKPYSGTA  | 120 |
| Z11/Pig/DOM/2021         | SQRLQLRFVPVDREDTQYTYKTRFQLAVGDNRVLDMASTYFDIRGVIDRGPSFKPYSGTA  | 120 |
| *****                    |                                                               |     |
| PAdV-5_(HNF-70)/AF289262 | YNPLAPKASVNNMTFENSNNPDQIRISMAQASFATPINDDTGAIEIPNQIIDLNYQPEPQL | 180 |
| GES7/Pig/DOM/2020        | YNPLAPKASVNNMTFENSNNPDQIRISMAQASFATPINDDTGAIEIPNQIIDLNYQPEPQL | 180 |
| Z11/Pig/DOM/2021         | YNPLAPKASVNNMTFENSNNPDQIRISMAQASFATPINDDTGAIEIPNQIIDLNYQPEPQL | 180 |
| *****                    |                                                               |     |
| PAdV-5_(HNF-70)/AF289262 | GEESWVSDVIDKPTQAAGRILSANNDPIPCYGSYARPTNQNGGQATAAVETINFKAGNAA  | 240 |
| GES7/Pig/DOM/2020        | GEESWVSDVIDKPTQAAGRILSANNDPIPCYGSYARPTNQNGGQATAAVETINFKAGNAA  | 240 |
| Z11/Pig/DOM/2021         | GEESWVSDVIDKPTQAAGRILSANNDPIPCYGSYARPTNQNGGQATAAVETINFKAGNAA  | 240 |
| *****                    |                                                               |     |
| PAdV-5_(HNF-70)/AF289262 | GIPDTGFVMEDVNLTPDTHLVYKVSEEDAGKTPALGQQAAPNRANYIGFRDNFIGLMYY   | 300 |
| GES7/Pig/DOM/2020        | GIPDTGFVMEDVNLTPDTHLVYKVSEEDAGKTPALGQQAAPNRANYIGFRDNFIGLMYY   | 300 |
| Z11/Pig/DOM/2021         | GIPDTGFVMEDVNLTPDTHLVYKVSEEDAGKTPALGQQAAPNRANYIGFRDNFIGLMYY   | 300 |
| *****                    |                                                               |     |
| PAdV-5_(HNF-70)/AF289262 | NSNGNLGVLAGQASQLNAVVDLQDRNTELSYQLMLDSLYDRSRYFSMWNQAIDSYDQDVR  | 360 |
| GES7/Pig/DOM/2020        | NSNGNLGVLAGQASQLNAVVDLQDRNTELSYQLMLDSLYDRSRYFSMWNQAIDSYDQDVR  | 360 |
| Z11/Pig/DOM/2021         | NSNGNLGVLAGQASQLNAVVDLQDRNTELSYQLMLDSLYDRSRYFSMWNQAIDSYDQDVR  | 360 |
| *****                    |                                                               |     |
| PAdV-5_(HNF-70)/AF289262 | VIENNGVEDDMPNYCFPLSGINTGATSVQVSLNQNNWVATNGASVNNYINIGNLDCMEIN  | 420 |
| GES7/Pig/DOM/2020        | VIENNGVEDDMPNYCFPLSGINTGATSVQVSLNQNNWVATNGASVNNYINIGNLDCMEIN  | 420 |
| Z11/Pig/DOM/2021         | VIENNGVEDDMPNYCFPLSGINTGATSVQVSLNQNNWVATNGASVNNYINIGNLDCMEIN  | 420 |
| *****                    |                                                               |     |
| PAdV-5_(HNF-70)/AF289262 | LAANLWRGFLYSNIALYLPDDLKFTPPNVVLPENTNTYAYMNGRLPAGGLVDITYVNIGAR | 480 |
| GES7/Pig/DOM/2020        | LAANLWRGFLYSNIALYLPDDLKFTPPNVVLPENTNTYAYMNGRLPAGGLVDITYVNIGAR | 480 |
| Z11/Pig/DOM/2021         | LAANLWRGFLYSNIALYLPDDLKFTPPNVVLPENTNTYAYMNGRLPAGGLVDITYVNIGAR | 480 |
| *****                    |                                                               |     |
| PAdV-5_(HNF-70)/AF289262 | WSLDVMDNVNPFNHHRNAGLRYSQLLGNGRYCQFHIQVPQKFFAIRNLLLPGTTYTEW    | 540 |
| GES7/Pig/DOM/2020        | WSLDVMDNVNPFNHHRNAGLRYSQLLGNGRYCQFHIQVPQKFFAIRNLLLPGTTYTEW    | 540 |
| Z11/Pig/DOM/2021         | WSLDVMDNVNPFNHHRNAGLRYSQLLGNGRYCQFHIQVPQKFFAIRNLLLPGTTYTEW    | 540 |
| *****                    |                                                               |     |
| PAdV-5_(HNF-70)/AF289262 | SFRKDVNMVLQSTLGNLDRVGDASIRIDSVNLYASFFPMAHNTASTLEAMLRNDTNDQSF  | 600 |
| GES7/Pig/DOM/2020        | SFRKDVNMVLQSTLGNLDRVGDASIRIDSVNLYASFFPMAHNTASTLEAMLRNDTNDQSF  | 600 |
| Z11/Pig/DOM/2021         | SFRKDVNMVLQSTLGNLDRVGDASIRIDSVNLYASFFPMAHNTASTLEAMLRNDTNDQSF  | 600 |
| *****                    |                                                               |     |
| PAdV-5_(HNF-70)/AF289262 | IDYLSSANMLYPI PAGASNLPISPSRNWAAFRGWSFTRLKQRETPALGSPDPYFTYSG   | 660 |
| GES7/Pig/DOM/2020        | IDYLSSANMLYPI PAGASNLPISPSRNWAAFRGWSFTRLKQRETPALGSPDPYFTYSG   | 660 |
| Z11/Pig/DOM/2021         | IDYLSSANMLYPI PAGASNLPISPSRNWAAFRGWSFTRLKQRETPALGSPDPYFTYSG   | 660 |
| *****                    |                                                               |     |
| PAdV-5_(HNF-70)/AF289262 | TIPYLDGTFYLNHTFRRVSIQFDSSVQWPGNDRLLTPNEFIKRTVDGEGYTVAQSNMTK   | 720 |
| GES7/Pig/DOM/2020        | TIPYLDGTFYLNHTFRRVSIQFDSSVQWPGNDRLLTPNEFIKRTVDGEGYTVAQSNMTK   | 720 |
| Z11/Pig/DOM/2021         | TIPYLDGTFYLNHTFRRVSIQFDSSVQWPGNDRLLTPNEFIKRTVDGEGYTVAQSNMTK   | 720 |
| *****                    |                                                               |     |

|                                        |                                                              |     |
|----------------------------------------|--------------------------------------------------------------|-----|
| PA <sub>AdV</sub> -5_(HNF-70)/AF289262 | DWFLVQMLANYNIGYQGYHLPDGYKDRNYSFLRNFQPMCRQVVDTANYAAYQNVMLTNQH | 780 |
| GES7/Pig/DOM/2020                      | DWFLVQMLANYNIGYQGYHLPDGYKDRNYSFLRNFQPMCRQVVDTANYAAYQNVMLTNQH | 780 |
| Z11/Pig/DOM/2021                       | DWFLVQMLANYNIGYQGYHLPDGYKDRNYSFLRNFQPMCRQVVDTANYAAYQNVMLTNQH | 780 |
|                                        | *****                                                        |     |
| PA <sub>AdV</sub> -5_(HNF-70)/AF289262 | NNSGFSGFASAAALPREGHPYANWPYPLVGANAVPTITQRKFLCDRTMWRIPFSSNFMSM | 840 |
| GES7/Pig/DOM/2020                      | NNSGFSGFASAAALPREGHPYANWPYPLVGANAVPTITQRKFLCDRTMWRIPFSSNFMSM | 840 |
| Z11/Pig/DOM/2021                       | NNSGFSGFASAAALPREGHPYANWPYPLVGANAVPTITQRKFLCDRTMWRIPFSSNFMSM | 840 |
|                                        | *****                                                        |     |
| PA <sub>AdV</sub> -5_(HNF-70)/AF289262 | GSLTDLGQNLLYANSAHALDMTFEVDAMEEPTLLYILFEVFDLVRVHQPHRGVIETVYLR | 900 |
| GES7/Pig/DOM/2020                      | GSLTDLGQNLLYANSAHALDMTFEVDAMEEPTLLYILFEVFDLVRVHQPHRGVIETVYLR | 900 |
| Z11/Pig/DOM/2021                       | GSLTDLGQNLLYANSAHALDMTFEVDAMEEPTLLYILFEVFDLVRVHQPHRGVIETVYLR | 900 |
|                                        | *****                                                        |     |
| PA <sub>AdV</sub> -5_(HNF-70)/AF289262 | TPFSAGNATT                                                   | 910 |
| GES7/Pig/DOM/2020                      | TPFSAGNATT                                                   | 910 |
| Z11/Pig/DOM/2021                       | TPFSAGNATT                                                   | 910 |
|                                        | *****                                                        |     |
