# Supplementary material for: High Rates of Detection and Molecular Characterization of Porcine Adenovirus Serotype 5 (Porcine mastadenovirus C) from Diarrheic Pigs
Source: MDPI journal article supplement (doi:10.3390/pathogens11101210), 2022-10-20
Supplement: s1 [file s1]

**Supplementary figure S5.** Multiple alignment of the putative DNA-dependent polymerase (pol) proteins of porcine adenovirus (PAdV) strains GES7 and Z11 with that of PAdV serotype 5 (PAdV-5) (species *Porcine mastadenovirus C*) reference strain HNF-70. Amino acid (aa) mismatches are highlighted with green. The two putative zinc finger motifs are shown with underline and red font, whilst the conserved region I has been highlighted with blue. The virus serotype (isolate)/GenBank accession number are shown for PAdV-5 isolate HNF-70, whilst the virus name/host/country/year have been mentioned for strains GES7 and Z11. A “\*” denotes an identical aa residue. Numbers to the right indicate the positions of the aa for respective PAdV strains.

|                           |                                                              |                                  |     |
|---------------------------|--------------------------------------------------------------|----------------------------------|-----|
| PAdV-5 (HNF-70) /AF289262 | MSVVPSDGSGRLLGAEGHPKHQQKGRGHGDEAETGRQT                       | YAGTARGRPARSGPVRGNLVAK           | 60  |
| GES7/Pig/DOM/2020         | MSVVPSDGSGRLLGAEGHPKHQQKGRGHGDEAETGRQT                       | YAGTARGRPARSGPVRGNLVAK           | 60  |
| Z11/Pig/DOM/2021          | MSVVPSDGSGRLLGAEGHPKHQQKGRGHGDEAETGRQT                       | YAGTARGRPARSGPVRGNLVAK           | 60  |
| *****                     |                                                              |                                  |     |
| PAdV-5 (HNF-70) /AF289262 | RATLSASGTLEDGTHVDIKFHSKTLEALENLFHLHLLQLPPLPPISTSNVSDVLQLL    | PR                               | 120 |
| GES7/Pig/DOM/2020         | RATLSASGTLEDGTHVDIKFHSKTLEALENLFHLHLLQLPPLPPISTSNVSDVLQLL    | PR                               | 120 |
| Z11/Pig/DOM/2021          | RATLSASGTLEDGTHVDIKFHSKTLEALENLFHLHLLQLPPLPPISTSNVSDVLQLL    | PR                               | 120 |
| *****                     |                                                              |                                  |     |
| PAdV-5 (HNF-70) /AF289262 | EGSVVYNRGRVSVKQVEIREPK                                       | HFHQFLKQGVYLIKEIQDTQKCEYCGDFFKTS | 180 |
| GES7/Pig/DOM/2020         | EGSVVYNRGRVSVKQVEIREPK                                       | HFHQFLKQGVYLIKEIQDTQKCEYCGDFFKTS | 180 |
| Z11/Pig/DOM/2021          | EGSVVYNRGRVSVKQVEIREPK                                       | HFHQFLKQGVYLIKEIQDTQKCEYCGDFFKTS | 180 |
| *****                     |                                                              |                                  |     |
| PAdV-5 (HNF-70) /AF289262 | TCSVRRRDYFHHVHHKSSDWENIPFQPLGSYRETERLYITYDVETYTWHGKHGKQLVP   |                                  | 240 |
| GES7/Pig/DOM/2020         | TCSVRRRDYFHHVHHKSSDWENIPFQPLGSYRETERLYITYDVETYTWHGKHGKQLVP   |                                  | 240 |
| Z11/Pig/DOM/2021          | TCSVRRRDYFHHVHHKSSDWENIPFQPLGSYRETERLYITYDVETYTWHGKHGKQLVP   |                                  | 240 |
| *****                     |                                                              |                                  |     |
| PAdV-5 (HNF-70) /AF289262 | FLLVFHISGEPHLVKVAESVAQDLNWCWTEKHTFYILNPQKSAVGRMFKSFRDELQNRV  |                                  | 300 |
| GES7/Pig/DOM/2020         | FLLVFHISGEPHLVKVAESVAQDLNWCWTEKHTFYILNPQKSAVGRMFKSFRDELQNRV  |                                  | 300 |
| Z11/Pig/DOM/2021          | FLLVFHISGEPHLVKVAESVAQDLNWCWTEKHTFYILNPQKSAVGRMFKSFRDELQNRV  |                                  | 300 |
| *****                     |                                                              |                                  |     |
| PAdV-5 (HNF-70) /AF289262 | TQDLWKTFLSQNPFLVETAARLNLSVDDITPEVLKKEKICGEPREFIEVYVIGHNISGFD |                                  | 360 |
| GES7/Pig/DOM/2020         | TQDLWKTFLSQNPFLVETAARLNLSVDDITPEVLKKEKICGEPREFIEVYVIGHNISGFD |                                  | 360 |
| Z11/Pig/DOM/2021          | TQDLWKTFLSQNPFLVETAARLNLSVDDITPEVLKKEKICGEPREFIEVYVIGHNISGFD |                                  | 360 |
| *****                     |                                                              |                                  |     |
| PAdV-5 (HNF-70) /AF289262 | EIVLAAQVICHQSKTIKAFKISRNFMPRNGKILFNDITFGLPNPLFEKRKEFQEWERGSM |                                  | 420 |
| GES7/Pig/DOM/2020         | EIVLAAQVICHQSKTIKAFKISRNFMPRNGKILFNDITFGLPNPLFEKRKEFQEWERGSM |                                  | 420 |
| Z11/Pig/DOM/2021          | EIVLAAQVICHQSKTIKAFKISRNFMPRNGKILFNDITFGLPNPLFEKRKEFQEWERGSM |                                  | 420 |
| *****                     |                                                              |                                  |     |
| PAdV-5 (HNF-70) /AF289262 | VQDMKQQFVKLMVRDTLMLTHTSLRNAAKAYDLPEKGCCPYEAVNEFYRTGTQKDED    |                                  | 480 |
| GES7/Pig/DOM/2020         | VQDMKQQFVKLMVRDTLMLTHTSLRNAAKAYDLPEKGCCPYEAVNEFYRTGTQKDED    |                                  | 480 |
| Z11/Pig/DOM/2021          | VQDMKQQFVKLMVRDTLMLTHTSLRNAAKAYDLPEKGCCPYEAVNEFYRTGTQKDED    |                                  | 480 |
| *****                     |                                                              |                                  |     |
| PAdV-5 (HNF-70) /AF289262 | GFPSLRWYKQDEEYALNKLWREKKCGAYDLISSTLTCAQDVLVTSSLVRKLQESYQSF   |                                  | 540 |
| GES7/Pig/DOM/2020         | GFPSLRWYKQDEEYALNKLWREKKCGAYDLISSTLTCAQDVLVTSSLVRKLQESYQSF   |                                  | 540 |
| Z11/Pig/DOM/2021          | GFPSLRWYKQDEEYALNKLWREKKCGAYDLISSTLTCAQDVLVTSSLVRKLQESYQSF   |                                  | 540 |
| *****                     |                                                              |                                  |     |
| PAdV-5 (HNF-70) /AF289262 | IANEVNLPDSSFNIFQRPTISSNSHAIFKQILYRAEKPERQHLGEVLLAPSNEYDYVRQ  |                                  | 600 |
| GES7/Pig/DOM/2020         | IANEVNLPDSSFNIFQRPTISSNSHAIFKQILYRAEKPERQHLGEVLLAPSNEYDYVRQ  |                                  | 600 |
| Z11/Pig/DOM/2021          | IANEVNLPDSSFNIFQRPTISSNSHAIFKQILYRAEKPERQHLGEVLLAPSNEYDYVRQ  |                                  | 600 |
| *****                     |                                                              |                                  |     |
| PAdV-5 (HNF-70) /AF289262 | SIRGGRCYPTYIGILHEPIYVDICGMYASALTHPMPSGSPLNPFERALAVAVWEDQLKS  |                                  | 660 |
| GES7/Pig/DOM/2020         | SIRGGRCYPTYIGILHEPIYVDICGMYASALTHPMPSGSPLNPFERALAVAVWEDQLKS  |                                  | 660 |
| Z11/Pig/DOM/2021          | SIRGGRCYPTYIGILHEPIYVDICGMYASALTHPMPSGSPLNPFERALAVAVWEDQLKS  |                                  | 660 |
| *****                     |                                                              |                                  |     |
| PAdV-5 (HNF-70) /AF289262 | VGQKMDYFDEKLLPGIFTIDADPPDESFLDVLPPFCSRKGGRLCWTNEPLRGEVATSVDV |                                  | 720 |
| GES7/Pig/DOM/2020         | VGQKMDYFDEKLLPGIFTIDADPPDESFLDVLPPFCSRKGGRLCWTNEPLRGEVATSVDV |                                  | 720 |
| Z11/Pig/DOM/2021          | VGQKMDYFDEKLLPGIFTIDADPPDESFLDVLPPFCSRKGGRLCWTNEPLRGEVATSVDV |                                  | 720 |
| *****                     |                                                              |                                  |     |

|                          |                                                                                                     |      |
|--------------------------|-----------------------------------------------------------------------------------------------------|------|
| PadV-5_(HNF-70)/AF289262 | ITLHNRGWRVRLVPDERTTIFPEWKCLAKEYVQLNIAAKEKADREKNQTMRSIAKLLSNA                                        | 780  |
| GES7/Pig/DOM/2020        | ITLHNRGWRVRLVPDERTTIFPEWKCLAKEYVQLNIAAKEKADREKNQTMRSIAKLLSNA                                        | 780  |
| Z11/Pig/DOM/2021         | ITLHNRGWRVRLVPDERTTIFPEWKCLAKEYVQLNIAAKEKADREKNQTMRSIAKLLSNA                                        | 780  |
|                          | *****                                                                                               |      |
| PadV-5_(HNF-70)/AF289262 | LYGSFATRLDNKKIVFSDQLEEESKNISRGKYSVKSSSFIEDNFSADIMPEFVVAYPP                                          | 840  |
| GES7/Pig/DOM/2020        | LYGSFATRLDNKKIVFSDQLEEESKNISRGKYSVKSSSFIEDNFSADIMPEFVVAYPP                                          | 840  |
| Z11/Pig/DOM/2021         | LYGSFATRLDNKKIVFSDQLEEESKNISRGKYSVKSSSFIEDNFSADIMPEFVVAYPP                                          | 840  |
|                          | *****                                                                                               |      |
| PadV-5_(HNF-70)/AF289262 | VADVSNEEDNEAAEEATPFIGKSDHVTYKYKPIITFLDVEDDDVCLHTLESSSSIVLNNRYA                                      | 900  |
| GES7/Pig/DOM/2020        | VADVSNEEDNEAAEEATPFIGKSDHVTYKYKPIITFLDVEDDDVCLHTLESSSSIVLNNRYA                                      | 900  |
| Z11/Pig/DOM/2021         | VADVSNEEDNEAAEEATPFIGKSDHVTYKYKPIITFLDVEDDDVCLHTLESSSSIVLNNRYA                                      | 900  |
|                          | *****                                                                                               |      |
| PadV-5_(HNF-70)/AF289262 | SHLASFVLAWARVVFVSEWSEFLYENDRGVPMEEERQIKSVYGD <del>TDS</del> SLFVTEEGHRLMKEKG                        | 960  |
| GES7/Pig/DOM/2020        | SHLASFVLAWARVVFVSEWSEFLYENDRGVPMEEERQIKSVYGD <del>TDS</del> SLFVTEEGHRLMKEKG                        | 960  |
| Z11/Pig/DOM/2021         | SHLASFVLAWARVVFVSEWSEFLYENDRGVPMEEERQIKSVYGD <del>TDS</del> SLFVTEEGHRLMKEKG                        | 960  |
|                          | *****                                                                                               |      |
| PadV-5_(HNF-70)/AF289262 | KHRIKKNGGSLVFD <del>PQHPQVTWLVE</del> CET <del>RC</del> DKCGEDAYSPTS <del>SVFLAPKLYALKSTVCS</del> C | 1020 |
| GES7/Pig/DOM/2020        | KHRIKKNGGSLVFD <del>PQHPQVTWLVE</del> CET <del>RC</del> DKCGEDAYSPTS <del>SVFLAPKLYALKSTVCS</del> C | 1020 |
| Z11/Pig/DOM/2021         | KHRIKKNGGSLVFD <del>PQHPQVTWLVE</del> CET <del>RC</del> DKCGEDAYSPTS <del>SVFLAPKLYALKSTVCS</del> C | 1020 |
|                          | *****                                                                                               |      |
| PadV-5_(HNF-70)/AF289262 | GYVGKGLRAKGHATSELSFDVLQRCYLEDLQLGSEKFKTSRLSLKRTLASCQSNAAPFT                                         | 1080 |
| GES7/Pig/DOM/2020        | GYVGKGLRAKGHATSELSFDVLQRCYLEDLQLGSEKFKTSRLSLKRTLASCQSNAAPFT                                         | 1080 |
| Z11/Pig/DOM/2021         | GYVGKGLRAKGHATSELSFDVLQRCYLEDLQLGSEKFKTSRLSLKRTLASCQSNAAPFT                                         | 1080 |
|                          | *****                                                                                               |      |
| PadV-5_(HNF-70)/AF289262 | VTEATL <del>TRTLRPWKDKTLT</del> QIDQNRLIPYSTSRPNPRNTDLCWMTLPWDS                                     | 1130 |
| GES7/Pig/DOM/2020        | VTEATL <del>TRTLRPWKDKTLT</del> QIDQNRLIPYSTSRPNPRNTDLCWMTLPWDS                                     | 1130 |
| Z11/Pig/DOM/2021         | VTEATL <del>TRTLRPWKDKTLT</del> QIDQNRLIPYSTSRPNPRNTDLCWMTLPWDS                                     | 1130 |
|                          | *****                                                                                               |      |
