# Supplementary material for: High Rates of Detection and Molecular Characterization of Porcine Adenovirus Serotype 5 (Porcine mastadenovirus C) from Diarrheic Pigs
Source: MDPI journal article supplement (doi:10.3390/pathogens11101210), 2022-10-20
Supplement: s1 [file s1]

**Supplementary figure S6.** Identification of the inverted CAAT box (shown with green), an upstream promoter element (blue), the canonical TATA box (orange), an initiator element (yellow), and the 2 downstream activating elements (grey and pink) in the putative major late promoter region of porcine adenovirus serotype 5 (species *Porcine mastadenovirus C*) strains HNF-70, GES7 and Z11. The virus serotype (isolate)/GenBank accession number are shown for PAdV-5 reference strain HNF-70, whilst the virus name/host/country/year have been mentioned for strains GES7 and Z11. A '\*' denotes an identical nucleotide (nt) residue. The nt positions correspond to those of the complete genome sequence of strain HNF-70.

|                                                                   |                                                                                                                                                                                                                                                                                                               |
|-------------------------------------------------------------------|---------------------------------------------------------------------------------------------------------------------------------------------------------------------------------------------------------------------------------------------------------------------------------------------------------------|
| PAdV-5_(HNF-70)/AF289262<br>GES7/Pig/DOM/2020<br>Z11/Pig/DOM/2021 | <div style="display: flex; justify-content: space-between;"> <span>5055</span> <span>5114</span> </div> CGTCATCGTCTCCACATCTAGAAATGTGATTGGTTTATATTGTATGTCACGTGATCAG<br>CGTCATCGTCTCCACATCTAGAAATGTGATTGGTTTATATTGTATGTCACGTGATCAG<br>CGTCATCGTCTCCACATCTAGAAATGTGATTGGTTTATATTGTATGTCACGTGATCAG<br>*****       |
| PAdV-5_(HNF-70)/AF289262<br>GES7/Pig/DOM/2020<br>Z11/Pig/DOM/2021 | <div style="display: flex; justify-content: space-between;"> <span>5115</span> <span>5174</span> </div> ATTTGCCATATAAAGGCGTGGCTTCTTCGGCGGCCTCATTGTCCTCGTTGGAGACGTCGG<br>ATTTGCCATATAAAGGCGTGGCTTCTTCGGCGGCCTCATTGTCCTCGTTGGAGACGTCGG<br>ATTTGCCATATAAAGGCGTGGCTTCTTCGGCGGCCTCATTGTCCTCGTTGGAGACGTCGG<br>***** |
| PAdV-5_(HNF-70)/AF289262<br>GES7/Pig/DOM/2020<br>Z11/Pig/DOM/2021 | <div style="display: flex; justify-content: space-between;"> <span>5175</span> <span>5234</span> </div> CGACAGGTGGGTAGGCTACGACAAATCTGGCATGATGTCCGCGCTGAAATTGTCTGTCT<br>CGACAGGTGGGTAGGCTACGACAAATCTGGCATGATGTCCGCGCTGAAATTGTCTGTCT<br>CGACAGGTGGGTAGGCTACGACAAATCTGGCATGATGTCCGCGCTGAAATTGTCTGTCT<br>*****    |
| PAdV-5_(HNF-70)/AF289262<br>GES7/Pig/DOM/2020<br>Z11/Pig/DOM/2021 | <div style="display: flex; justify-content: space-between;"> <span>5235</span> <span>5294</span> </div> CTATGAAGGATGAAGATTTGACAGAGTACTTGCCCCGGAGATGTTCTTTGAGCTCTCTT<br>CTATGAAGGATGAAGATTTGACAGAGTACTTGCCCCGGAGATGTTCTTTGAGCTCTCTT<br>CTATGAAGGATGAAGATTTGACAGAGTACTTGCCCCGGAGATGTTCTTTGAGCTCTCTT<br>*****    |
