# Supplementary material for: High Rates of Detection and Molecular Characterization of Porcine Adenovirus Serotype 5 (Porcine mastadenovirus C) from Diarrheic Pigs
Source: Pathogens. 2022 Oct 20;11(10):1210. doi: 10.3390/pathogens11101210 (PMC9610507; doi:10.3390/pathogens11101210)
Supplement: Supplementary file 1 [file pathogens-11-01210-s001.zip]

Archive with 6 entries (6 files):
- Supplementary figure S1.pdf
- Supplementary figure S3.pdf
- Supplementary figure S4.pdf
- Supplementary figure S5.pdf
- Supplementary figure S6.pdf
- Supplementary table S2.pdf
